# Supplementary material for: Transkingdom network reveals bacterial players associated with cervical cancer gene expression program
Source: PeerJ journal article supplement (doi:10.7717/peerj.5590), 2018-09-19
Supplement: Figure_S1.pdf [file Figure_S1.pdf]

Shannon Diversity Index
