# Supplementary material for: Transkingdom network reveals bacterial players associated with cervical cancer gene expression program
Source: PubMed Central journal article supplement (PMC6170155; doi:10.7717/peerj.5590), 2018-09-19

**A**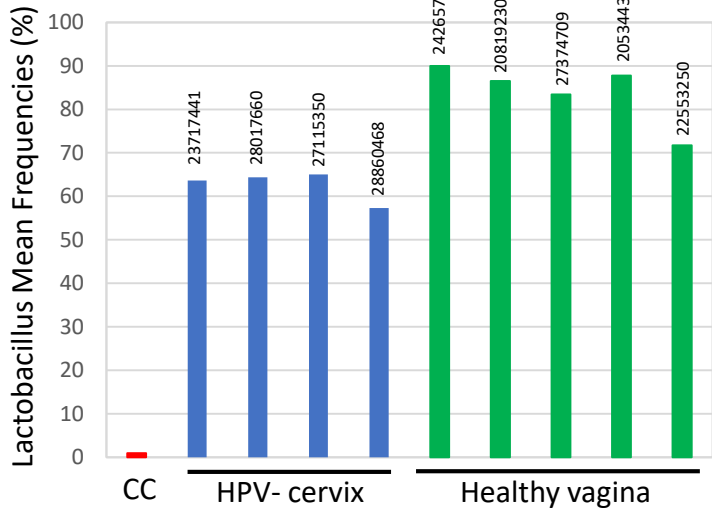**B**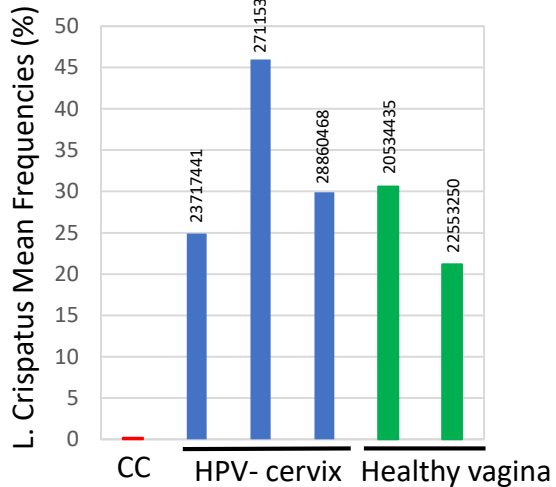

Supplement: peerj-06-5590-s002.pdf [file peerj-06-5590-s002.pdf]
