# Supplementary material for: Transkingdom network reveals bacterial players associated with cervical cancer gene expression program
Source: PubMed Central journal article supplement (PMC6170155; doi:10.7717/peerj.5590), 2018-09-19

BTN3A2

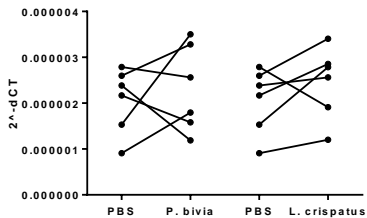

HLA-F

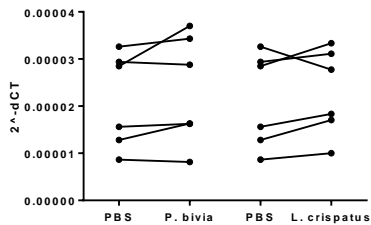

IFI44L

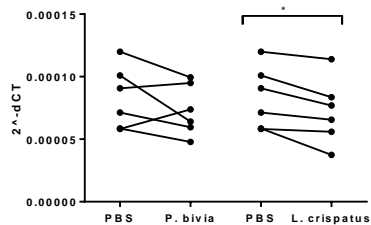

IFI144

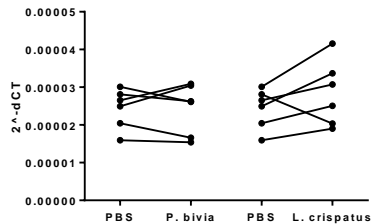

DDN

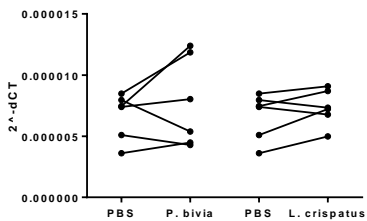

Supplement: peerj-06-5590-s003.pdf [file peerj-06-5590-s003.pdf]
