# Supplementary material for: Transkingdom network reveals bacterial players associated with cervical cancer gene expression program
Source: PeerJ. 2018 Sep 19;6:e5590. doi: 10.7717/peerj.5590 (PMC6170155; doi:10.7717/peerj.5590)
Supplement: Supplemental Information 4 [file peerj-06-5590-s004.xlsx]

## Sheet: Sheet1
PatientID	SampleID	Histology	pg bact DNA/10ng total	16S reads
P-002	83	SCC	16.79	93031
P-018	84	SCC	133.42	142602
P-053	85	SCC	17.21	87900
P-057	86	Adeno SCC	184.42	102866
P-063	87	SCC	18.97	113715
P-078	88	SCC	449.44	116684
P-091	89	SCC	7.32	90130
P-098	90	SCC	81.56	130073
P-129	91	SCC	135.55	125168
P-138	92	SCC	3.43	90943
P-146	93	SCC	7.21	90110
P-172	94	SCC	6.11	107247
P-177	95	SCC	11.29	86740
P-178	96	Adeno SCC	121.92	132248
P-188	97	SCC	10.25	96330
P-203	98	SCC	50.92	109634
P-210	99	SCC	10.13	102492
P-220	100	SCC	10.24	94350
P-232	101	SCC	7.23	114070
P-235	102	SCC	14.51	28570
P-236	103	SCC	76.84	104945
P-239	104	SCC	3.39	110657
P-246	105	SCC	11.81	92071
P-261	106	SCC	25	100875
P-270	107	SCC	4.39	10884
P-271	108	SCC	9.76	88613
P-275	109	SCC	9.67	19056
P-279	110	SCC	3.85	60990
P-292	111	SCC	259.27	112757
P-293	112	SCC	17.05	96024
P-301	113	Adeno SCC	85.35	86415
P-303	114	SCC	84.49	115197
P-322	115	SCC	75.22	115462
P-326	116	SCC	5.77	75523
P-068	117	SCC	1.73	12756
P-087	118	SCC	2.99	65247
P-124	119	SCC	1.36	19882
P-363	120	SCC	35.91	50447
P-368	121	SCC	107.13	79390
P-374	122	SCC	247.09	174693
P-390	123	SCC	0	122320
P-083	124	SCC	0.41	10678
P-115	125	SCC	0.21	6774
P-162	126	SCC	0.2	31568
P-281	127	SCC	0.35	7460
P-284	128	SCC	0.25	23900
P-361	129	SCC	0.04	1679
P-371	130	SCC	0.38	26687
P-039	131	Adeno SCC	0.14	2942
P-054	132	SCC	0.22	4264
P-072	133	SCC	0.36	19084
P-084	134	SCC	0.22	7468
P-125	135	SCC	0.15	3475
P-126	136	SCC	0.22	4211
P-133	137	SCC	0.23	244
P-141	138	SCC	0.24	7593
P-149	139	SCC	0.54	46227
P-196	140	SCC	0.2	2394
