# Supplementary material for: Transkingdom network reveals bacterial players associated with cervical cancer gene expression program
Source: PeerJ. 2018 Sep 19;6:e5590. doi: 10.7717/peerj.5590 (PMC6170155; doi:10.7717/peerj.5590)
Supplement: Supplemental Information 7 [file peerj-06-5590-s007.xlsx]

## Sheet: Mean
PMID	V6	V5	V4	V3	V2	V1	Sample type		Prevotella Freq (%)	Prevotella bivia (%)	Lactobacillus Freq (%)	L.crispatus (%)	Bacillaceae	Halobacteriaceae	Peptoniphilus	Anaerococcus
Current Study	-	-	+	-	-	-	Biopsy	CC	14.8	0.85	0.91	0.18	0.54	0.72	2.28	1.98
23717441	-	-	-	+	+	-	cervix endo	HPV-	8.6	NA	63.6	24.9	0.1	NA	0.1	0.6
28017660	-	-	+	-	-	-	cervix endo	HPV-	5.4	NA	64.4	NA	NA	NA	NA	NA
27115350	-	-	+	+	-	-	cervix ecto	HPV-	0	NA	65	46	NA	NA	0	0
28860468	-	+	+	+	-	-	cervix ecto	HPV-	4.5	NA	57.3	29.9	0.01	NA	0.13	0.13
24265786	+	-	-	-	-	-	vaginal swab	Normal	0.1	NA	90	NA	NA	NA	NA	NA
20819230	-	-	-	+	-	-	vaginal swab	Normal	0.16	NA	86.48	NA	NA	NA	0	0
27374709	-	+	+	+	-	-	vaginal swab	Normal	0.8	NA	83.41	NA	NA	NA	NA	NA
20534435	-	-	-	-	+	+	vaginal swabs	Normal	2	NA	87.8	30.6	NA	NA	0.4	0.6
22553250	-	-	-	-	+	+	vaginal swabs	Normal	2.4	NA	71.7	21.2	0	NA	1.1	1.1

## Sheet: Median
PMID	V6	V5	V4	V3	V2	V1	Sample type		Prevotella Freq (%)	Prevotella bivia (%)	Lactobacillus Freq (%)	L.crispatus (%)	Bacillaceae	Halobacteriaceae	Peptoniphilus	Anaerococcus
Current Study	-	-	+	-	-	-	Biopsy	CC	7.48	0.03	0.01	0	0.147	0.18	0.33	0.26
23717441	-	-	-	+	+	-	cervix endo	HPV-	NA	NA	NA	NA	NA	NA	NA	NA
28017660	-	-	+	-	-	-	cervix endo	HPV-	NA	NA	NA	NA	NA	NA	NA	NA
27115350	-	-	+	+	-	-	cervix ecto	HPV-	0	NA	65.3	61	NA	NA	0	0
28860468	-	+	+	+	-	-	cervix ecto	HPV-	0.007	NA	NA	NA	0	NA	0	0
24265786	+	-	-	-	-	-	vaginal swab	Normal	NA	NA	NA	NA	NA	NA	NA	NA
20819230	-	-	-	+	-	-	vaginal swab	Normal	NA	NA	NA	NA	NA	NA	NA	NA
27374709	-	+	+	+	-	-	vaginal swab	Normal	NA	NA	NA	NA	NA	NA	NA	NA
20534435	-	-	-	-	+	+	vaginal swabs	Normal	0.1	NA	18.7	0.5	NA	NA	0	0
22553250	-	-	-	-	+	+	vaginal swabs	Normal	0.05	NA	21.5	0.04	0	NA	0	0
