# Supplementary material for: Transkingdom network reveals bacterial players associated with cervical cancer gene expression program
Source: PeerJ. 2018 Sep 19;6:e5590. doi: 10.7717/peerj.5590 (PMC6170155; doi:10.7717/peerj.5590)
Supplement: Supplemental Information 8 [file peerj-06-5590-s008.xlsx]

## Sheet: Sheet1
Gene name	Primer Name	Sequence	Scale	Purification	Length	Location	Amplicon size	Comments	transcript variants that exist	for which tv it works	tested?	which one is preffered to use
5	4_HLA-A-F_qPCR	CCGCGAGCCAGAAGATGG	25nm	STD	18	275-292	102	do not span junction	1,2	1,2
5	4_HLA-A_R_qPCR	CAGTCTGTGAGTGGGCCTTCAT	25nm	STD	22	376-355
	2_HLA-B-F_qPCR	CCTAGCAGTTGTGGTCATCGG	25nm	STD	21	1038-1058	195	do not span junction	1	1
	2_HLA-B_R_qPCR	GAGGCGTGAAGAAATCCTGC	25nm	STD	20	1232-1213
	1_CLEC2B_F_qPCR	CTGTTCCACTCAACATGCCG	25nm	STD	20	843-862	180	do not span junction	1	1
	1_CLEC2B_R_qPCR	CCTTCACTCCCTCTCATGCC	25nm	STD	20	1022-1003
	2_C3_F_qPCR	CGGATCTTCACCGTCAACCA	25nm	STD	20	535-554	154	do not span junction	1	1
	2_C3_R_qPCR	CGAGTTCCGGAATGTCCCAA	25nm	STD	20	688-669
	2_IFI35_F_qPCR	TGAGGTGTATTTCGGGTCTTGC	25nm	STD	22	85-106	213	do not span junction	1,2	1,2
	2_IFI35_R_qPCR	TCCCACAGCCTCATCTTGAGT	25nm	STD	21	297-277
	1_CD55_F_qPCR	TCATGCCCTAATCCGGGAGA	25nm	STD	20	778-797	153	do not span junction	1,2,5,6,7	1,2,5,6,7
	1_CD55_R_qPCR	CTGGACAGAGCTGCCTGAAA	25nm	STD	20	930-911
4	2_BTN3A2_F_qPCR	AACAGAGCGGGAAATAAGCCT	25nm	STD	21	896-916	172	do not span junction	1,2,3,4,5	1,2,3,4,5
4	2_BTN3A2_R_qPCR	GTCCATGGGGTCAGCCATTTT	25nm	STD	21	1067-1047
3	1_TAP1_F_qPCR	GTTCGAAGCTTTGCCAACGA	25nm	STD	20	1464-1483	209	do not span junction	1,2	1,2
3	1_TAP1_R_qPCR	GTGACAAGGTTCCCACTGCT	25nm	STD	20	1672-1653
	4_HLA-F_F_qPCR	CCCCGCGGGACTCATATTTT	25nm	STD	20	82-101	200	do not span junction, not seperated by intron	1,2,3	1,2,3
	4_HLA-F_R_qPCR	GCGTGTCGTCTACGTACTCC	25nm	STD	20	281-262
8	2_DDN_F_qPCR	CTCTGGGTGCAGAAGTCCAAG	25nm	STD	21	94-114	95	does not span junction, not seperated by intron
8	2_DDN_R_qPCR	AAGTCCATGGGCTGTCGAGAA	25nm	STD	21	188-168
	CEP70_2_F	GGAGCAGAAAACTTTACAGGTGA	25nm	STD		447-469	130				50658081c2
	CEP70_2_R	AGTGACAATGCGATCTTCTTCC	25nm	STD		576-555
	S100PBP_3_F	CCTGACAGTGAGAACCCTACG	25nm	STD		685-705	108				371122112c3
	S100PBP_3_R	ACAACTTGACTTGTGTGAACCAC	25nm	STD		792-770
7	IFI44_3_F	GGTGGGCACTAATACAACTGG	25nm	STD		657-677	95				166706910c3
7	IFI44_3_R	CACACAGAATAAACGGCAGGTA	25nm	STD		751-730
6	IFI44L
6	LAMP3
	NEK2
	RFC4
	TPX2
2	STAT1
	RFX5

## Sheet: Sheet2
Gene name	F/R	Sequence	Location	Amplicon size
LAMP3	Forward	GCGTCCCTGGCCGTAATTT	37-55	141
LAMP3	Reverse	TGCTTGCTTAGCTGGTTGCT	177-158	141
STAT1	Forward	GCGCAGAAAAGTTTCATTTGCT	227-248	111
STAT1	Reverse	CTACGCACAGCACGTTAGGT	337-318	111
TAP1	Forward	GTTCGAAGCTTTGCCAACGA	1464-1483	209
TAP1	Reverse	GTGACAAGGTTCCCACTGCT	1672-1653	209
BTN3A2	Forward	AACAGAGCGGGAAATAAGCCT	896-916	172
BTN3A2	Reverse	GTCCATGGGGTCAGCCATTTT	1067-1047	172
HLA-A	Forward	CCGCGAGCCAGAAGATGG	275-292	102
HLA-A	Reverse	CAGTCTGTGAGTGGGCCTTCAT	376-355	102
IFI44L	Forward	AGCCGTCAGGGATGTACTATAAC	333-355	116
IFI44L	Reverse	AGGGAATCATTTGGCTCTGTAGA	448-426	116
IFI44	Forward	GGTGGGCACTAATACAACTGG	657-677	95
IFI44	Reverse	CACACAGAATAAACGGCAGGTA	751-730	95
DDN	Forward	CTCTGGGTGCAGAAGTCCAAG	94-114	95
DDN	Reverse	AAGTCCATGGGCTGTCGAGAA	188-168	95
18S	Forward	GTAACCCGTTGAACCCCATT	1577-1596	151
18S	Reverse	CCATCCAATCGGTAGTAGCG	1727-1708	151
